# Supplementary material
Source: MDPI journal article supplement (https://www.mdpi.com/2071-1050/10/12/4488)
Supplement: s1 [file s1]

Archive with 3 entries (2 files):
- Supplements/
- Supplements/TreeO_supp1.docx
- Supplements/TreeO_supp2.pdf
