# Supplementary material
Source: MDPI journal article supplement (https://www.mdpi.com/2071-1050/10/12/4488)
Supplement: s1 [file s1 › Supplements/TreeO_supp1.docx]

Supplement 1

Optimization scheme according to MOC4. Standardized singular benefits (SB) scores alongside gross benefits (GB) and coincident co-benefits (CCB). Because the MOC4 optimization scheme is calculated in the same manner as CCB, census block groups (CBGs) are sorted here according to CCB. Benefits provision is calculated for each benefits metric as the product of the score for that metric and the number of tree candidate sites in each CBG. The fractional benefits provision (FBP) for each benefits metric is the ratio of the sum of benefits provision of all CBGs where the cumulative tree candidate sites are fewer than 10,001 to the sum of benefits provision for all CBGs.

| | Census Block Group ID | Tree Sites | SB Emissions | SB  Vulnerability | SB Stormwater | SB Walkability | GB | CCB | | --- | --- | --- | --- | --- | --- | --- | --- | | 370630013011 | 319 | 0.835 | 0.480 | 0.464 | 0.441 | 0.888 | 1.000 | | 370630010012 | 282 | 0.824 | 0.413 | 0.484 | 0.469 | 0.876 | 0.941 | | 370630003012 | 213 | 1.000 | 0.113 | 0.385 | 1.000 | 1.000 | 0.532 | | 370630010024 | 108 | 0.659 | 0.893 | 0.335 | 0.161 | 0.819 | 0.388 | | 370630003023 | 352 | 0.811 | 0.195 | 0.293 | 0.597 | 0.758 | 0.336 | | 370630014001 | 119 | 0.343 | 1.000 | 0.378 | 0.178 | 0.760 | 0.281 | | 370630010011 | 210 | 0.588 | 0.285 | 0.450 | 0.294 | 0.647 | 0.270 | | 370630009001 | 104 | 0.679 | 0.253 | 0.428 | 0.253 | 0.645 | 0.226 | | 370630013032 | 61 | 0.766 | 0.156 | 0.793 | 0.182 | 0.759 | 0.211 | | 370630013031 | 392 | 0.544 | 0.229 | 0.708 | 0.192 | 0.669 | 0.207 | | 370630011002 | 272 | 0.551 | 0.374 | 0.396 | 0.192 | 0.605 | 0.191 | | 370630023001 | 267 | 0.525 | 0.287 | 0.686 | 0.150 | 0.659 | 0.189 | | 370630022001 | 1030 | 0.622 | 0.185 | 0.415 | 0.298 | 0.608 | 0.174 | | 370630010023 | 120 | 0.516 | 0.217 | 0.517 | 0.227 | 0.591 | 0.160 | | 370630013041 | 398 | 0.407 | 0.402 | 0.353 | 0.206 | 0.547 | 0.145 | | 370630010013 | 264 | 0.649 | 0.190 | 0.574 | 0.162 | 0.630 | 0.139 | | 370630003013 | 212 | 0.980 | 0.053 | 0.249 | 0.826 | 0.843 | 0.130 | | 370630020261 | 218 | 0.511 | 0.253 | 0.442 | 0.142 | 0.539 | 0.099 | | 370630004021 | 492 | 0.696 | 0.096 | 0.530 | 0.228 | 0.620 | 0.098 | | 370630004012 | 115 | 0.893 | 0.084 | 0.484 | 0.221 | 0.673 | 0.098 | | 370630005004 | 116 | 0.426 | 0.427 | 0.290 | 0.151 | 0.518 | 0.097 | | 370630003022 | 103 | 0.745 | 0.126 | 0.372 | 0.211 | 0.581 | 0.089 | | 370630011001 | 261 | 0.193 | 0.529 | 0.795 | 0.088 | 0.642 | 0.087 | | 370630005001 | 172 | 0.465 | 0.834 | 0.414 | 0.039 | 0.701 | 0.076 | | 370630020273 | 75 | 0.822 | 0.091 | 0.703 | 0.113 | 0.692 | 0.073 | | 370630001011 | 137 | 0.749 | 0.098 | 0.822 | 0.092 | 0.704 | 0.067 | | 370630005003 | 88 | 0.416 | 0.207 | 0.644 | 0.094 | 0.544 | 0.063 | | 370630020232 | 151 | 0.567 | 0.191 | 0.436 | 0.103 | 0.519 | 0.059 | | 370630015021 | 125 | 0.528 | 0.885 | 0.317 | 0.031 | 0.704 | 0.057 | | 370630007001 | 441 | 0.407 | 0.202 | 0.481 | 0.115 | 0.482 | 0.056 | | 370630017071 | 134 | 0.612 | 0.112 | 0.614 | 0.104 | 0.577 | 0.054 | | 370630010021 | 131 | 0.687 | 0.298 | 0.395 | 0.052 | 0.573 | 0.052 | | 370630001021 | 230 | 0.589 | 0.196 | 0.499 | 0.063 | 0.539 | 0.044 | | 370630002002 | 175 | 0.434 | 0.157 | 0.340 | 0.144 | 0.430 | 0.041 | | 370630020151 | 73 | 0.649 | 0.191 | 0.453 | 0.054 | 0.539 | 0.037 | | 370630017053 | 153 | 0.366 | 0.129 | 0.990 | 0.059 | 0.618 | 0.034 | | 370630017112 | 60 | 0.383 | 0.290 | 0.489 | 0.050 | 0.485 | 0.033 | | 370630020091 | 323 | 0.456 | 0.103 | 0.402 | 0.141 | 0.441 | 0.032 | | 370630002003 | 216 | 0.682 | 0.049 | 0.311 | 0.231 | 0.509 | 0.029 | | 370630006001 | 80 | 0.504 | 0.282 | 0.436 | 0.037 | 0.504 | 0.028 | | 370630006002 | 233 | 0.445 | 0.104 | 0.322 | 0.144 | 0.406 | 0.026 | | 370630020132 | 86 | 0.939 | 0.045 | 0.404 | 0.127 | 0.606 | 0.026 | | 370630020152 | 158 | 0.269 | 0.269 | 0.451 | 0.061 | 0.420 | 0.024 | | 370630014002 | 308 | 0.366 | 0.368 | 0.351 | 0.042 | 0.451 | 0.024 | | 370630015024 | 49 | 0.677 | 0.216 | 0.350 | 0.034 | 0.511 | 0.021 | | 370630005002 | 93 | 0.826 | 0.026 | 0.397 | 0.196 | 0.578 | 0.021 | | 370630020212 | 136 | 0.790 | 0.056 | 0.473 | 0.078 | 0.558 | 0.020 | | 370630002001 | 141 | 0.682 | 0.108 | 0.616 | 0.036 | 0.577 | 0.020 | | 370630020093 | 172 | 0.635 | 0.058 | 0.359 | 0.111 | 0.465 | 0.018 | | 370630009002 | 159 | 0.204 | 0.422 | 0.243 | 0.070 | 0.376 | 0.018 | | 370630003021 | 87 | 0.663 | 0.097 | 0.158 | 0.139 | 0.423 | 0.017 | | 370630017113 | 78 | 0.446 | 0.230 | 0.188 | 0.073 | 0.375 | 0.017 | | 370630017051 | 115 | 0.681 | 0.081 | 0.387 | 0.066 | 0.486 | 0.017 | | 370630017075 | 725 | 0.348 | 0.030 | 0.646 | 0.200 | 0.490 | 0.016 | | 370630001012 | 132 | 0.615 | 0.087 | 0.218 | 0.111 | 0.412 | 0.016 | | 370630004013 | 230 | 0.606 | 0.066 | 0.349 | 0.090 | 0.444 | 0.015 | | 370630020133 | 121 | 0.771 | 0.038 | 0.367 | 0.109 | 0.514 | 0.014 | | 370630017073 | 111 | 0.908 | 0.025 | 0.242 | 0.205 | 0.552 | 0.014 | | 370630020253 | 178 | 0.755 | 0.047 | 0.301 | 0.102 | 0.482 | 0.013 | | 370630020073 | 47 | 0.677 | 0.084 | 0.341 | 0.055 | 0.463 | 0.013 | | 370630020251 | 385 | 0.543 | 0.064 | 0.182 | 0.165 | 0.381 | 0.013 | | 370630020252 | 292 | 0.488 | 0.048 | 0.347 | 0.123 | 0.403 | 0.012 | | 370630020262 | 383 | 0.644 | 0.063 | 0.371 | 0.059 | 0.455 | 0.011 | | 370630020211 | 469 | 0.713 | 0.022 | 0.809 | 0.061 | 0.642 | 0.009 | | 370630015023 | 120 | 0.412 | 0.376 | 0.281 | 0.017 | 0.435 | 0.009 | | 370630017102 | 21 | 0.442 | 0.385 | 0.209 | 0.019 | 0.422 | 0.008 | | 370630018023 | 93 | 0.514 | 0.102 | 0.366 | 0.035 | 0.407 | 0.008 | | 370630018073 | 202 | 0.540 | 0.025 | 0.501 | 0.096 | 0.464 | 0.008 | | 370630017092 | 57 | 0.665 | 0.214 | 0.043 | 0.101 | 0.409 | 0.007 | | 370630020092 | 98 | 0.616 | 0.097 | 0.109 | 0.088 | 0.364 | 0.007 | | 370630020072 | 253 | 0.555 | 0.026 | 0.448 | 0.078 | 0.443 | 0.006 | | 370630017093 | 547 | 0.319 | 0.107 | 0.229 | 0.057 | 0.285 | 0.005 | | 370630020131 | 37 | 0.709 | 0.021 | 0.775 | 0.038 | 0.617 | 0.005 | | 370630001022 | 173 | 0.466 | 0.076 | 0.289 | 0.041 | 0.348 | 0.005 | | 370630017062 | 38 | 0.473 | 0.176 | 0.707 | 0.006 | 0.545 | 0.005 | | 370630020272 | 641 | 0.599 | 0.033 | 0.246 | 0.077 | 0.382 | 0.005 | | 370630017081 | 228 | 0.496 | 0.104 | 0.124 | 0.059 | 0.313 | 0.005 | | 370630017111 | 110 | 0.715 | 0.075 | 0.083 | 0.081 | 0.382 | 0.004 | | 370630010022 | 103 | 0.587 | 0.050 | 0.188 | 0.065 | 0.356 | 0.004 | | 370630017052 | 150 | 0.507 | 0.055 | 0.309 | 0.038 | 0.364 | 0.004 | | 370630007003 | 85 | 0.721 | 0.028 | 0.154 | 0.091 | 0.398 | 0.004 | | 370630020242 | 55 | 0.532 | 0.033 | 0.229 | 0.072 | 0.346 | 0.004 | | 370630018022 | 6 | 0.441 | 0.230 | 0.531 | 0.005 | 0.483 | 0.003 | | 370630004011 | 111 | 0.607 | 0.015 | 0.509 | 0.055 | 0.474 | 0.003 | | 370630020241 | 488 | 0.631 | 0.018 | 0.135 | 0.164 | 0.379 | 0.003 | | 370630007002 | 300 | 0.329 | 0.037 | 0.172 | 0.118 | 0.262 | 0.003 | | 370630020221 | 120 | 0.582 | 0.102 | 0.078 | 0.052 | 0.326 | 0.003 | | 370630018062 | 379 | 0.692 | 0.013 | 0.425 | 0.064 | 0.478 | 0.003 | | 370630020243 | 36 | 0.682 | 0.019 | 0.308 | 0.059 | 0.427 | 0.003 | | 370630017061 | 78 | 0.626 | 0.030 | 0.326 | 0.038 | 0.408 | 0.003 | | 370630003011 | 262 | 0.440 | 0.087 | 0.119 | 0.047 | 0.277 | 0.003 | | 370630018021 | 72 | 0.455 | 0.110 | 0.172 | 0.025 | 0.305 | 0.003 | | 370630018081 | 225 | 0.700 | 0.008 | 0.371 | 0.096 | 0.470 | 0.002 | | 370630020222 | 142 | 0.558 | 0.092 | 0.045 | 0.088 | 0.313 | 0.002 | | 370630017101 | 140 | 0.526 | 0.106 | 0.060 | 0.049 | 0.297 | 0.002 | | 370630020153 | 142 | 0.570 | 0.100 | 0.123 | 0.023 | 0.326 | 0.002 | | 370630017074 | 209 | 0.631 | 0.008 | 0.371 | 0.083 | 0.437 | 0.002 | | 370630020071 | 68 | 0.475 | 0.033 | 0.282 | 0.034 | 0.330 | 0.002 | | 370630018092 | 244 | 0.479 | 0.028 | 0.196 | 0.055 | 0.303 | 0.002 | | 370630017091 | 6 | 0.405 | 0.214 | 0.392 | 0.004 | 0.406 | 0.002 | | 370630016031 | 33 | 0.582 | 0.022 | 0.336 | 0.032 | 0.389 | 0.002 | | 370630020182 | 202 | 0.483 | 0.043 | 0.323 | 0.019 | 0.347 | 0.002 | | 370630020183 | 324 | 0.674 | 0.008 | 0.400 | 0.057 | 0.456 | 0.002 | | 370630020172 | 169 | 0.529 | 0.009 | 0.430 | 0.055 | 0.410 | 0.001 | | 370630016032 | 183 | 0.791 | 0.014 | 0.147 | 0.067 | 0.407 | 0.001 | | 370630020231 | 58 | 0.375 | 0.044 | 0.163 | 0.037 | 0.248 | 0.001 | | 370630020162 | 177 | 0.416 | 0.062 | 0.104 | 0.035 | 0.247 | 0.001 | | 370630020173 | 225 | 0.428 | 0.035 | 0.222 | 0.026 | 0.285 | 0.001 | | 370630018071 | 81 | 0.241 | 0.099 | 0.271 | 0.012 | 0.249 | 0.001 | | 370630020202 | 423 | 0.717 | 0.004 | 0.280 | 0.093 | 0.438 | 0.001 | | 370630020201 | 358 | 0.677 | 0.003 | 0.215 | 0.155 | 0.420 | 0.001 | | 370630018024 | 32 | 0.564 | 0.049 | 0.149 | 0.018 | 0.312 | 0.001 | | 370630020081 | 10 | 0.830 | 0.047 | 0.195 | 0.009 | 0.432 | 0.001 | | 370630020161 | 52 | 0.157 | 0.309 | 0.152 | 0.008 | 0.251 | 0.001 | | 370630023002 | 215 | 0.377 | 0.006 | 0.314 | 0.073 | 0.308 | 0.001 | | 370630020271 | 137 | 0.481 | 0.022 | 0.313 | 0.015 | 0.332 | 0.001 | | 370630020281 | 345 | 0.485 | 0.002 | 1.000 | 0.051 | 0.615 | 0.001 | | 370630018082 | 377 | 0.458 | 0.011 | 0.195 | 0.045 | 0.284 | 0.001 | | 370630020191 | 113 | 0.500 | 0.014 | 0.490 | 0.013 | 0.406 | 0.001 | | 370630015022 | 29 | 0.097 | 0.083 | 0.181 | 0.027 | 0.155 | 0.000 | | 370630016041 | 161 | 0.521 | 0.005 | 0.326 | 0.045 | 0.359 | 0.000 | | 370630018012 | 7 | 0.471 | 0.060 | 0.189 | 0.007 | 0.290 | 0.000 | | 370630018091 | 196 | 0.238 | 0.044 | 0.222 | 0.015 | 0.208 | 0.000 | | 370630020082 | 80 | 0.561 | 0.006 | 0.343 | 0.032 | 0.377 | 0.000 | | 370630016042 | 58 | 0.530 | 0.016 | 0.407 | 0.010 | 0.385 | 0.000 | | 370630020193 | 55 | 0.454 | 0.010 | 0.321 | 0.020 | 0.322 | 0.000 | | 370630018013 | 123 | 0.579 | 0.023 | 0.075 | 0.022 | 0.280 | 0.000 | | 370630016012 | 16 | 0.659 | 0.019 | 0.318 | 0.005 | 0.400 | 0.000 | | 370630018011 | 107 | 0.443 | 0.018 | 0.139 | 0.018 | 0.247 | 0.000 | | 370630020282 | 39 | 0.218 | 0.053 | 0.110 | 0.014 | 0.158 | 0.000 | | 370630016013 | 10 | 0.506 | 0.051 | 0.245 | 0.003 | 0.322 | 0.000 | | 370630020192 | 43 | 0.424 | 0.007 | 0.513 | 0.010 | 0.382 | 0.000 | | 370630018014 | 121 | 0.535 | 0.007 | 0.201 | 0.016 | 0.304 | 0.000 | | 370630018072 | 177 | 0.305 | 0.020 | 0.070 | 0.029 | 0.170 | 0.000 | | 370630020181 | 39 | 0.472 | 0.032 | 0.092 | 0.008 | 0.242 | 0.000 | | 370630016033 | 11 | 0.940 | 0.014 | 0.146 | 0.005 | 0.442 | 0.000 | | 370630020171 | 147 | 0.319 | 0.001 | 0.635 | 0.012 | 0.387 | 0.000 | | 370630015031 | 83 | 0.712 | 0.000 | 0.111 | 0.225 | 0.419 | 0.000 | | 370630015011 | 425 | 0.702 | 0.000 | 0.074 | 0.129 | 0.362 | 0.000 | | 370630006003 | 79 | 0.671 | 0.000 | 0.712 | 0.023 | 0.562 | 0.000 | | 370630017072 | 182 | 0.638 | 0.016 | 0.000 | 0.015 | 0.268 | 0.000 | | 371350109021 | 1 | 0.000 | 0.013 | 0.358 | 0.000 | 0.148 | 0.000 | | 371350122011 | 8 | 0.233 | 0.004 | 0.399 | 0.000 | 0.254 | 0.000 | |
| --- | --- | --- | --- | --- | --- | --- | --- | --- | --- | --- | --- | --- | --- | --- | --- | --- | --- | --- | --- | --- | --- | --- | --- | --- | --- | --- | --- | --- | --- | --- | --- | --- | --- | --- | --- | --- | --- | --- | --- | --- | --- | --- | --- | --- | --- | --- | --- | --- | --- | --- | --- | --- | --- | --- | --- | --- | --- | --- | --- | --- | --- | --- | --- | --- | --- | --- | --- | --- | --- | --- | --- | --- | --- | --- | --- | --- | --- | --- | --- | --- | --- | --- | --- | --- | --- | --- | --- | --- | --- | --- | --- | --- | --- | --- | --- | --- | --- | --- | --- | --- | --- | --- | --- | --- | --- | --- | --- | --- | --- | --- | --- | --- | --- | --- | --- | --- | --- | --- | --- | --- | --- | --- | --- | --- | --- | --- | --- | --- | --- | --- | --- | --- | --- | --- | --- | --- | --- | --- | --- | --- | --- | --- | --- | --- | --- | --- | --- | --- | --- | --- | --- | --- | --- | --- | --- | --- | --- | --- | --- | --- | --- | --- | --- | --- | --- | --- | --- | --- | --- | --- | --- | --- | --- | --- | --- | --- | --- | --- | --- | --- | --- | --- | --- | --- | --- | --- | --- | --- | --- | --- | --- | --- | --- | --- | --- | --- | --- | --- | --- | --- | --- | --- | --- | --- | --- | --- | --- | --- | --- | --- | --- | --- | --- | --- | --- | --- | --- | --- | --- | --- | --- | --- | --- | --- | --- | --- | --- | --- | --- | --- | --- | --- | --- | --- | --- | --- | --- | --- | --- | --- | --- | --- | --- | --- | --- | --- | --- | --- | --- | --- | --- | --- | --- | --- | --- | --- | --- | --- | --- | --- | --- | --- | --- | --- | --- | --- | --- | --- | --- | --- | --- | --- | --- | --- | --- | --- | --- | --- | --- | --- | --- | --- | --- | --- | --- | --- | --- | --- | --- | --- | --- | --- | --- | --- | --- | --- | --- | --- | --- | --- | --- | --- | --- | --- | --- | --- | --- | --- | --- | --- | --- | --- | --- | --- | --- | --- | --- | --- | --- | --- | --- | --- | --- | --- | --- | --- | --- | --- | --- | --- | --- | --- | --- | --- | --- | --- | --- | --- | --- | --- | --- | --- | --- | --- | --- | --- | --- | --- | --- | --- | --- | --- | --- | --- | --- | --- | --- | --- | --- | --- | --- | --- | --- | --- | --- | --- | --- | --- | --- | --- | --- | --- | --- | --- | --- | --- | --- | --- | --- | --- | --- | --- | --- | --- | --- | --- | --- | --- | --- | --- | --- | --- | --- | --- | --- | --- | --- | --- | --- | --- | --- | --- | --- | --- | --- | --- | --- | --- | --- | --- | --- | --- | --- | --- | --- | --- | --- | --- | --- | --- | --- | --- | --- | --- | --- | --- | --- | --- | --- | --- | --- | --- | --- | --- | --- | --- | --- | --- | --- | --- | --- | --- | --- | --- | --- | --- | --- | --- | --- | --- | --- | --- | --- | --- | --- | --- | --- | --- | --- | --- | --- | --- | --- | --- | --- | --- | --- | --- | --- | --- | --- | --- | --- | --- | --- | --- | --- | --- | --- | --- | --- | --- | --- | --- | --- | --- | --- | --- | --- | --- | --- | --- | --- | --- | --- | --- | --- | --- | --- | --- | --- | --- | --- | --- | --- | --- | --- | --- | --- | --- | --- | --- | --- | --- | --- | --- | --- | --- | --- | --- | --- | --- | --- | --- | --- | --- | --- | --- | --- | --- | --- | --- | --- | --- | --- | --- | --- | --- | --- | --- | --- | --- | --- | --- | --- | --- | --- | --- | --- | --- | --- | --- | --- | --- | --- | --- | --- | --- | --- | --- | --- | --- | --- | --- | --- | --- | --- | --- | --- | --- | --- | --- | --- | --- | --- | --- | --- | --- | --- | --- | --- | --- | --- | --- | --- | --- | --- | --- | --- | --- | --- | --- | --- | --- | --- | --- | --- | --- | --- | --- | --- | --- | --- | --- | --- | --- | --- | --- | --- | --- | --- | --- | --- | --- | --- | --- | --- | --- | --- | --- | --- | --- | --- | --- | --- | --- | --- | --- | --- | --- | --- | --- | --- | --- | --- | --- | --- | --- | --- | --- | --- | --- | --- | --- | --- | --- | --- | --- | --- | --- | --- | --- | --- | --- | --- | --- | --- | --- | --- | --- | --- | --- | --- | --- | --- | --- | --- | --- | --- | --- | --- | --- | --- | --- | --- | --- | --- | --- | --- | --- | --- | --- | --- | --- | --- | --- | --- | --- | --- | --- | --- | --- | --- | --- | --- | --- | --- | --- | --- | --- | --- | --- | --- | --- | --- | --- | --- | --- | --- | --- | --- | --- | --- | --- | --- | --- | --- | --- | --- | --- | --- | --- | --- | --- | --- | --- | --- | --- | --- | --- | --- | --- | --- | --- | --- | --- | --- | --- | --- | --- | --- | --- | --- | --- | --- | --- | --- | --- | --- | --- | --- | --- | --- | --- | --- | --- | --- | --- | --- | --- | --- | --- | --- | --- | --- | --- | --- | --- | --- | --- | --- | --- | --- | --- | --- | --- | --- | --- | --- | --- | --- | --- | --- | --- | --- | --- | --- | --- | --- | --- | --- | --- | --- | --- | --- | --- | --- | --- | --- | --- | --- | --- | --- | --- | --- | --- | --- | --- | --- | --- | --- | --- | --- | --- | --- | --- | --- | --- | --- | --- | --- | --- | --- | --- | --- | --- | --- | --- | --- | --- | --- | --- | --- | --- | --- | --- | --- | --- | --- | --- | --- | --- | --- | --- | --- | --- | --- | --- | --- | --- | --- | --- | --- | --- | --- | --- | --- | --- | --- | --- | --- | --- | --- | --- | --- | --- | --- | --- | --- | --- | --- | --- | --- | --- | --- | --- | --- | --- | --- | --- | --- | --- | --- | --- | --- | --- | --- | --- | --- | --- | --- | --- | --- | --- | --- | --- | --- | --- | --- | --- | --- | --- | --- | --- | --- | --- | --- | --- | --- | --- | --- | --- | --- | --- | --- | --- | --- | --- | --- | --- | --- | --- | --- | --- | --- | --- | --- | --- | --- | --- | --- | --- | --- | --- | --- | --- | --- | --- | --- | --- | --- | --- | --- | --- | --- | --- | --- | --- | --- | --- | --- | --- | --- | --- | --- | --- | --- | --- | --- | --- | --- | --- | --- | --- | --- | --- | --- | --- | --- | --- | --- | --- | --- | --- | --- | --- | --- | --- | --- | --- | --- | --- | --- | --- | --- | --- | --- | --- | --- | --- | --- | --- | --- | --- | --- | --- | --- | --- | --- | --- | --- | --- | --- | --- | --- | --- | --- | --- | --- | --- | --- | --- | --- | --- | --- | --- | --- | --- | --- | --- | --- | --- | --- | --- | --- | --- | --- | --- | --- | --- | --- | --- | --- | --- | --- | --- | --- | --- | --- | --- | --- | --- | --- | --- | --- | --- | --- | --- | --- | --- | --- | --- | --- | --- | --- | --- | --- | --- | --- | --- | --- | --- | --- | --- | --- | --- | --- | --- | --- | --- | --- | --- | --- | --- | --- | --- | --- | --- | --- | --- | --- | --- | --- | --- | --- | --- | --- | --- | --- | --- | --- | --- | --- | --- | --- | --- | --- | --- | --- | --- | --- | --- | --- | --- | --- | --- | --- | --- | --- | --- | --- | --- | --- | --- | --- | --- | --- | --- | --- | --- | --- | --- | --- | --- | --- | --- | --- | --- | --- | --- | --- | --- | --- | --- | --- | --- | --- | --- | --- | --- | --- | --- | --- | --- | --- | --- | --- | --- | --- | --- | --- | --- |
